# Supplementary material for: Mental health and post-traumatic stress disorder in firefighters: an integrated analysis from an action research study
Source: PubMed Central journal article supplement (PMC10642162; doi:10.3389/fpsyg.2023.1259388), 2023-10-27
Supplement: Data_Sheet_1.pdf [file Data_Sheet_1.pdf]

## *Supplementary Material*

# **Mental health and Post-Traumatic Stress Disorder in firefighters: an integrated analysis from an action-research study**

**Joana Oliveira<sup>†</sup>, Joana Aires Dias<sup>†</sup>, Isabel Catarina Duarte, Salomé Caldeira, António Reis Marques, Vítor Rodrigues, João Redondo<sup>#</sup> and Miguel Castelo-Branco<sup>#,\*</sup>**

<sup>†</sup> these authors contributed equally to this work and share first authorship

<sup>#</sup> these authors shared equal senior authorship

**\* Correspondence:** Corresponding Author: mcbranco@fmed.uc.pt

## **1 Supplementary Figures and Tables**

### **1.1 Supplementary Tables**

| Characteristics                                                      | <i>f</i> | Valid % | N   |
|----------------------------------------------------------------------|----------|---------|-----|
| <i>Sociodemographic</i>                                              |          |         |     |
| Age ( <i>M</i> =35.6, <i>Sd</i> =10.1, <i>Md</i> =36.0, range=19-58) |          |         | 130 |
| <i>Sex</i>                                                           |          |         |     |
| Female                                                               | 37       | 28.5    | 130 |
| Male                                                                 | 90       | 69.2    |     |
| Non Disclosed                                                        | 3        | 2.3     |     |
| <i>Nationality</i>                                                   |          |         |     |
| Portuguese                                                           | 130      | 100.0   | 130 |
| <i>Education</i>                                                     |          |         |     |
| Primary (1°, 2°, 3°, 4°)                                             | 2        | 1.5     | 130 |
| Primary (5°, 6°)                                                     | 6        | 4.6     |     |
| Primary (7°, 8°, 9°)                                                 | 26       | 20.0    |     |
| Secondary (10°, 11°, 12°)                                            | 58       | 44.6    |     |
| Technical course (not at university)                                 | 9        | 6.9     |     |
| Higher education (university)                                        | 29       | 22.3    |     |
| <i>Location of employment</i>                                        |          |         |     |
| Predominantly urban                                                  | 7        | 5.4     | 130 |
| Predominantly rural                                                  | 50       | 38.5    |     |
| Mixed urban and rural                                                | 73       | 56.2    |     |
| <i>Marital status</i>                                                |          |         |     |
| Single                                                               | 61       | 46.9    | 130 |
| Married                                                              | 46       | 35.4    |     |
| Non-marital Union                                                    | 19       | 14.6    |     |
| Divorced                                                             | 4        | 3.1     |     |

|                                                                                                  |     |       |     |
|--------------------------------------------------------------------------------------------------|-----|-------|-----|
| <i>Years together (if married or in non-marital union) (M=13.4, Sd=9.3, Md=12.0, range=1-38)</i> |     |       | 65  |
| <i>Number of children</i>                                                                        |     |       | 130 |
| 0                                                                                                | 68  | 52.3  |     |
| 1                                                                                                | 34  | 26.2  |     |
| 2                                                                                                | 23  | 17.7  |     |
| 3                                                                                                | 3   | 2.3   |     |
| 4                                                                                                | 2   | 1.5   |     |
| <i>Age of children</i>                                                                           |     |       |     |
| First (M=13.9, Sd=9.4, Md=12.0, range=0-39)                                                      |     |       | 62  |
| Second (M=12.2, Sd=7.3, Md=12.0, range=1-26)                                                     |     |       | 28  |
| Third (M=8.0, Sd=7.1, Md=6.0, range=1-16)                                                        |     |       | 5   |
| Fourth (M=15.5, Sd=3.5, Md=15.5, range=13-18)                                                    |     |       | 2   |
| <b><i>Consumption habits</i></b>                                                                 |     |       |     |
| <i>Alcohol</i>                                                                                   |     |       | 130 |
| Drinks alcohol                                                                                   | 52  | 40.0  |     |
| Does not drink alcohol                                                                           | 75  | 57.7  |     |
| Chose to not respond                                                                             | 3   | 2.3   |     |
| <i>Number of drinks per day</i>                                                                  |     |       |     |
| Beer (M=1.5, Sd=1.1, Md=1.0, range=0-5)                                                          |     |       | 52  |
| Wine (M=0.8, Sd=1.1, Md=0.0, range=0-4)                                                          |     |       | 52  |
| Whiskey (M=0.0, Sd=0.1, Md=0.0, range=0-1)                                                       |     |       | 52  |
| <i>Think they have a drinking problem</i>                                                        |     |       | 130 |
| No                                                                                               | 130 | 100.0 |     |
| Yes                                                                                              | 0   | 0.0   |     |
| <i>Family thinks they have a drinking problem</i>                                                |     |       | 130 |
| No                                                                                               | 128 | 98.5  |     |
| Yes                                                                                              | 2   | 1.5   |     |
| <i>Coffee</i>                                                                                    |     |       | 130 |
| Drinks coffee                                                                                    | 119 | 91.5  |     |
| Does not drink coffee                                                                            | 11  | 8.5   |     |
| <i>Number of coffee cups per day (M=2.9, Sd=1.3, Md=3.0, range=1-8)</i>                          |     |       | 119 |
| <i>Smoking</i>                                                                                   |     |       | 130 |
| Smokes regularly                                                                                 | 48  | 36.9  |     |
| Does not smoke regularly                                                                         | 81  | 62.3  |     |
| Chose to not respond                                                                             | 1   | 0.8   |     |
| <i>Number of cigarettes smoked per day (M=11.4, Sd=5.7, Md=10.0, range=2-20)</i>                 |     |       | 48  |
| <i>Frequency of medication consumption for anxiety, depression, sleep disorders, etc.</i>        |     |       | 130 |
| Never                                                                                            | 102 | 78.5  |     |
| Rarely                                                                                           | 14  | 10.8  |     |
| Sometimes                                                                                        | 5   | 3.8   |     |
| Regularly                                                                                        | 2   | 1.5   |     |
| Daily                                                                                            | 7   | 5.4   |     |
| <b><i>Professional Conditions and Status</i></b>                                                 |     |       |     |
| <i>Employment status</i>                                                                         |     |       | 130 |
| Unemployed                                                                                       | 14  | 10.8  |     |
| Employed                                                                                         | 102 | 78.5  |     |

|                                                                                        |     |      |     |
|----------------------------------------------------------------------------------------|-----|------|-----|
| Student                                                                                | 10  | 7.7  |     |
| Retired                                                                                | 1   | 0.8  |     |
| Other employment status                                                                | 3   | 2.3  |     |
| <i>Activity sector</i>                                                                 |     |      | 130 |
| Primary (agriculture)                                                                  | 1   | 0.8  |     |
| Secondary (service providers)                                                          | 106 | 81.5 |     |
| Tertiary (industry)                                                                    | 23  | 17.7 |     |
| <b><i>Firefighting Activity</i></b>                                                    |     |      |     |
| <i>Years in service (M=13.9, Sd=9.8, Md=12.0, range=1-40)</i>                          |     |      | 130 |
| <i>Work regimen</i>                                                                    |     |      | 130 |
| Professional                                                                           | 14  | 10.8 |     |
| Voluntary                                                                              | 82  | 63.1 |     |
| Professional and voluntary                                                             | 34  | 26.2 |     |
| <i>Firefighting occupation</i>                                                         |     |      | 48  |
| Member of the Permanent Intervention Team (PIT)                                        | 11  | 22.9 |     |
| Commander                                                                              | 2   | 4.2  |     |
| Drivers                                                                                | 18  | 37.5 |     |
| Central operator                                                                       | 4   | 8.3  |     |
| Operational assistant                                                                  | 2   | 4.2  |     |
| Other                                                                                  | 11  | 22.9 |     |
| <i>Years in specific firefighting occupation (M=13.8, Sd=9.8, Md=12.0, range=1-15)</i> |     |      | 46  |
| Member of the Permanent Intervention Team (PIT) (M=6.4, Sd=4.7, Md=5.0, range=1-15)    |     |      | 11  |
| Commander (M=2.0, Sd=0.0, Md=2.0, range=2-2)                                           |     |      | 2   |
| Drivers (M=8.7, Sd=8.2, Md=7.0, range=0-25)                                            |     |      | 18  |
| Central operator (M=6.0, Sd=6.1, Md=3.0, range=2-13)                                   |     |      | 3   |
| Operational assistant (M=0.5, Sd=0.7, Md=0.5, range=0-1)                               |     |      | 2   |
| Other (M=9.6, Sd=10.6, Md=6.0, range=1-31)                                             |     |      | 10  |
| <i>Hours worked per week (M=31.8, Sd=21.8, Md=24.0, range=2-84)</i>                    |     |      | 130 |
| Member of the Permanent Intervention Team (PIT) (M=59.9, Sd=8.9, Md=60.0, range=50-84) |     |      | 11  |
| Commander (M=42.5, Sd=3.5, Md=42.5, range=40-45)                                       |     |      | 2   |
| Drivers (M=51.7, Sd=14.4, Md=50.0, range=10-72)                                        |     |      | 18  |
| Central operator (M=41.3, Sd=6.3, Md=40.0, range=35-50)                                |     |      | 4   |
| Operational Assistant (M=53.5, Sd=2.1, Md=53.5, range=52-55)                           |     |      | 2   |
| Other (M=57.4, Sd=8.9, Md=60.0, range=40-70)                                           |     |      | 11  |

**Supplementary Table 1.** *Participants' sociodemographic characteristics, consumption habits, Professional status and Firefighting occupation.*

| Variables                    | 1.    | 2.    | 3.    | 4.    | 5.    | 6.    | 7.    | 8.    | 9.    | 10.   | 11.   | 12.   | 13.   | 14.   | 15. |
|------------------------------|-------|-------|-------|-------|-------|-------|-------|-------|-------|-------|-------|-------|-------|-------|-----|
| 1. PSDI                      | -     |       |       |       |       |       |       |       |       |       |       |       |       |       |     |
| 2. Somatization              | .59** | -     |       |       |       |       |       |       |       |       |       |       |       |       |     |
| 3. Obsession-Compulsion      | .73** | .62** | -     |       |       |       |       |       |       |       |       |       |       |       |     |
| 4. Interpersonal Sensibility | .69** | .53** | .74** | -     |       |       |       |       |       |       |       |       |       |       |     |
| 5. Depression                | .74** | .60** | .79** | .81** | -     |       |       |       |       |       |       |       |       |       |     |
| 6. Anxiety                   | .65** | .77** | .73** | .67** | .75** | -     |       |       |       |       |       |       |       |       |     |
| 7. Hostility                 | .59** | .57** | .66** | .64** | .70** | .69** | -     |       |       |       |       |       |       |       |     |
| 8. Phobic Anxiety            | .50** | .53** | .59** | .63** | .64** | .67** | .57** | -     |       |       |       |       |       |       |     |
| 9. Paranoid Ideation         | .71** | .52** | .66** | .82** | .71** | .68** | .62** | .59** | -     |       |       |       |       |       |     |
| 10. Psychoticism             | .66** | .51** | .76** | .79** | .81** | .72** | .72** | .61** | .71** | -     |       |       |       |       |     |
| 11. PCL-5 Total              | .33** | .26** | .37** | .46** | .33** | .41** | .49** | .23*  | .53** | .39** | -     |       |       |       |     |
| 12. Intrusion Symptoms       | .25** | .18*  | .24*  | .30** | .26** | .26** | .42** | .07   | .37** | .24** | .77*  | -     |       |       |     |
| 13. Avoidance                | .25** | .10   | .17   | .32** | .17   | .21*  | .29** | .10   | .38** | .20*  | .70** | .62** | -     |       |     |
| 14. NACM                     | .26** | .22*  | .36** | .45** | .31** | .43*  | .42** | .30** | .47** | .43** | .82** | .39** | .39** | -     |     |
| 15. AAR                      | .28** | .27*  | .36** | .38** | .28** | .38** | .38** | .24*  | .46** | .33** | .86** | .45** | .42** | .75** | -   |

\* $p < .05$ , \*\* $p < .001$

**Supplementary Table 2.** Pearson correlation matrix between BSI and PCL-5 scores for non-PTSD subsample.

| Variables                    | 1.    | 2.    | 3.    | 4.   | 5.   | 6.    | 7.    | 8.   | 9.   | 10. | 11.  | 12.  | 13.  | 14. | 15. |
|------------------------------|-------|-------|-------|------|------|-------|-------|------|------|-----|------|------|------|-----|-----|
| 1. PSDI                      | -     |       |       |      |      |       |       |      |      |     |      |      |      |     |     |
| 2. Somatization              | .77*  | -     |       |      |      |       |       |      |      |     |      |      |      |     |     |
| 3. Obsession-Compulsion      | .87** | .83** | -     |      |      |       |       |      |      |     |      |      |      |     |     |
| 4. Interpersonal Sensibility | .84** | .65*  | .85** | -    |      |       |       |      |      |     |      |      |      |     |     |
| 5. Depression                | .92** | .64*  | .82*  | .76* | -    |       |       |      |      |     |      |      |      |     |     |
| 6. Anxiety                   | .83** | .92** | .93** | .81* | .78* | -     |       |      |      |     |      |      |      |     |     |
| 7. Hostility                 | .63*  | .43   | .58*  | .58* | .68* | .52   | -     |      |      |     |      |      |      |     |     |
| 8. Phobic Anxiety            | .63*  | .75*  | .86** | .66* | .61* | .84** | .38   | -    |      |     |      |      |      |     |     |
| 9. Paranoid Ideation         | .66*  | .71*  | .71*  | .73* | .53  | .73*  | .10   | .67* | -    |     |      |      |      |     |     |
| 10. Psychoticism             | .68*  | .52   | .70*  | .81* | .75* | .67*  | .56   | .61* | .66* | -   |      |      |      |     |     |
| 11. PCL-5 Total              | .52   | .56   | .40   | .22  | .61* | .47   | .71** | .39  | .13  | .39 | -    |      |      |     |     |
| 12. Intrusion Symptoms       | .41   | .61*  | .43   | .32  | .31  | .50   | .61*  | .57  | .19  | .25 | .69* | -    |      |     |     |
| 13. Avoidance                | .09   | -.13  | -.26  | -.07 | .18  | -.19  | .15   | -.47 | -.14 | .19 | .22  | -.10 | -    |     |     |
| 14. NACM                     | .16   | .24   | .17   | -.05 | .39  | .19   | .50   | .14  | -.10 | .29 | .79* | .20  | .16  | -   |     |
| 15. AAR                      | .65*  | .54   | .57   | .36  | .66* | .55   | .39   | .51  | .41  | .19 | .60* | .33  | -.27 | .38 | -   |

\* $p < .05$ , \*\* $p < .001$

**Supplementary Table 3.** Pearson correlation matrix between BSI and PCL-5 scores for PTSD subsample.
